# Supplementary material
Source: PubMed Central journal article supplement (PMC3351343)

### **Supplementary Figure Legends**

**Fig. 1: FUT8 enzyme activities decreased in *Fut8* deficient MEF cell lines.** FUT8 enzyme activities were analyzed for all types of cell lines used in this study. No activities were detected in *Fut8* knock out (*Fut8*<sup>-/-</sup>) cells and only half of the activities were found in knock down (*Fut8*<sup>KD</sup>) cells, compared with those of wild type (*Fut8*<sup>+/+</sup>) cells.

**Fig. 2: N-glycan synthesis by GnT-III, GnT-IV, GnT-V and FUT8**

FUT8 enzyme activities

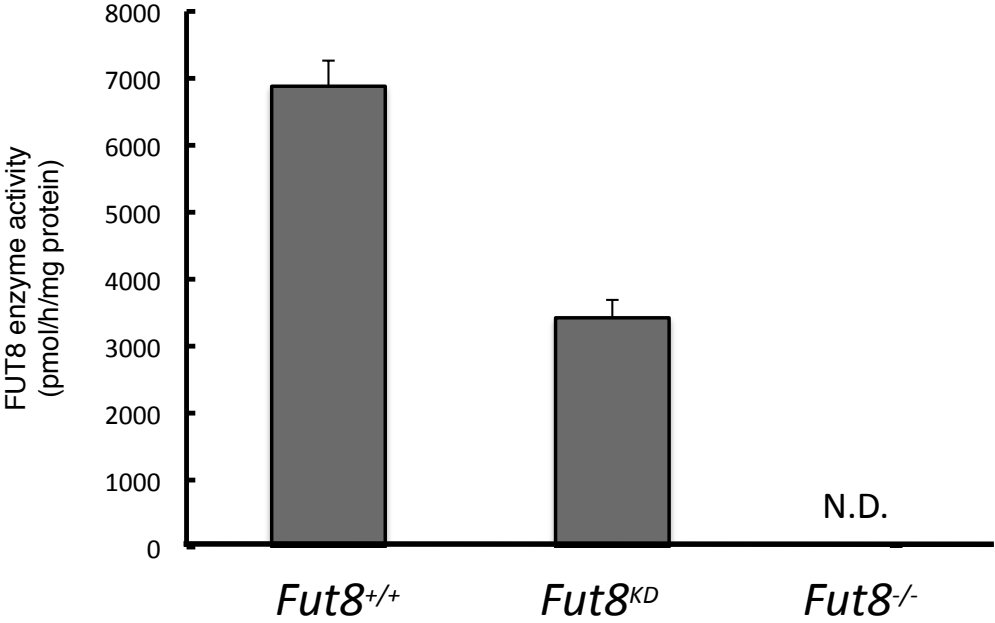

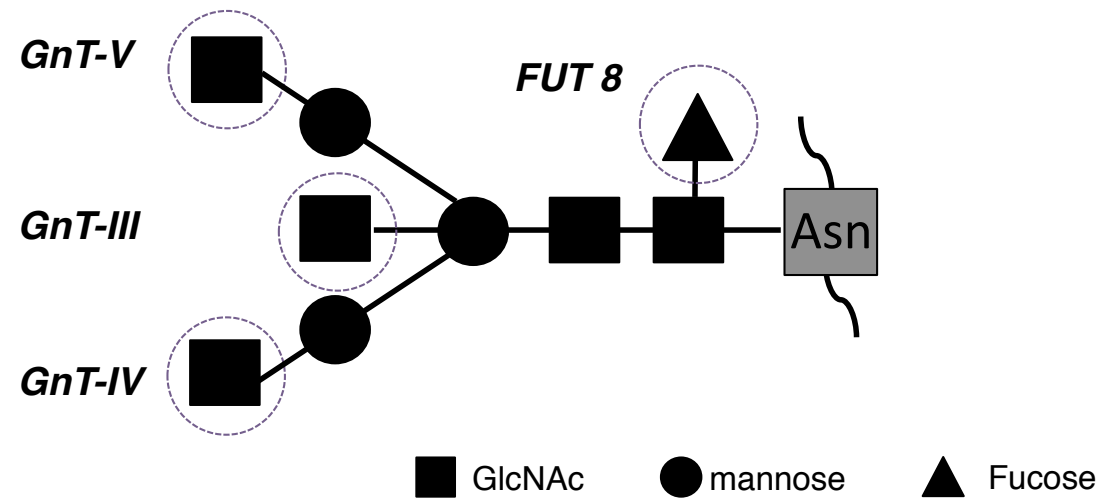

Supplement: supp_M111.315333_jbc.M111.315333-1.pdf [file supp_M111.315333_jbc.M111.315333-1.pdf]
